# Supplementary material for: Food Intake and Satiety Response after Medium-Chain Triglycerides Ingested as Solid or Liquid
Source: MDPI journal article supplement (doi:10.3390/nu11071638), 2019-07-17

Supplementary material 1: Diagram indicating flow of participants through the study.

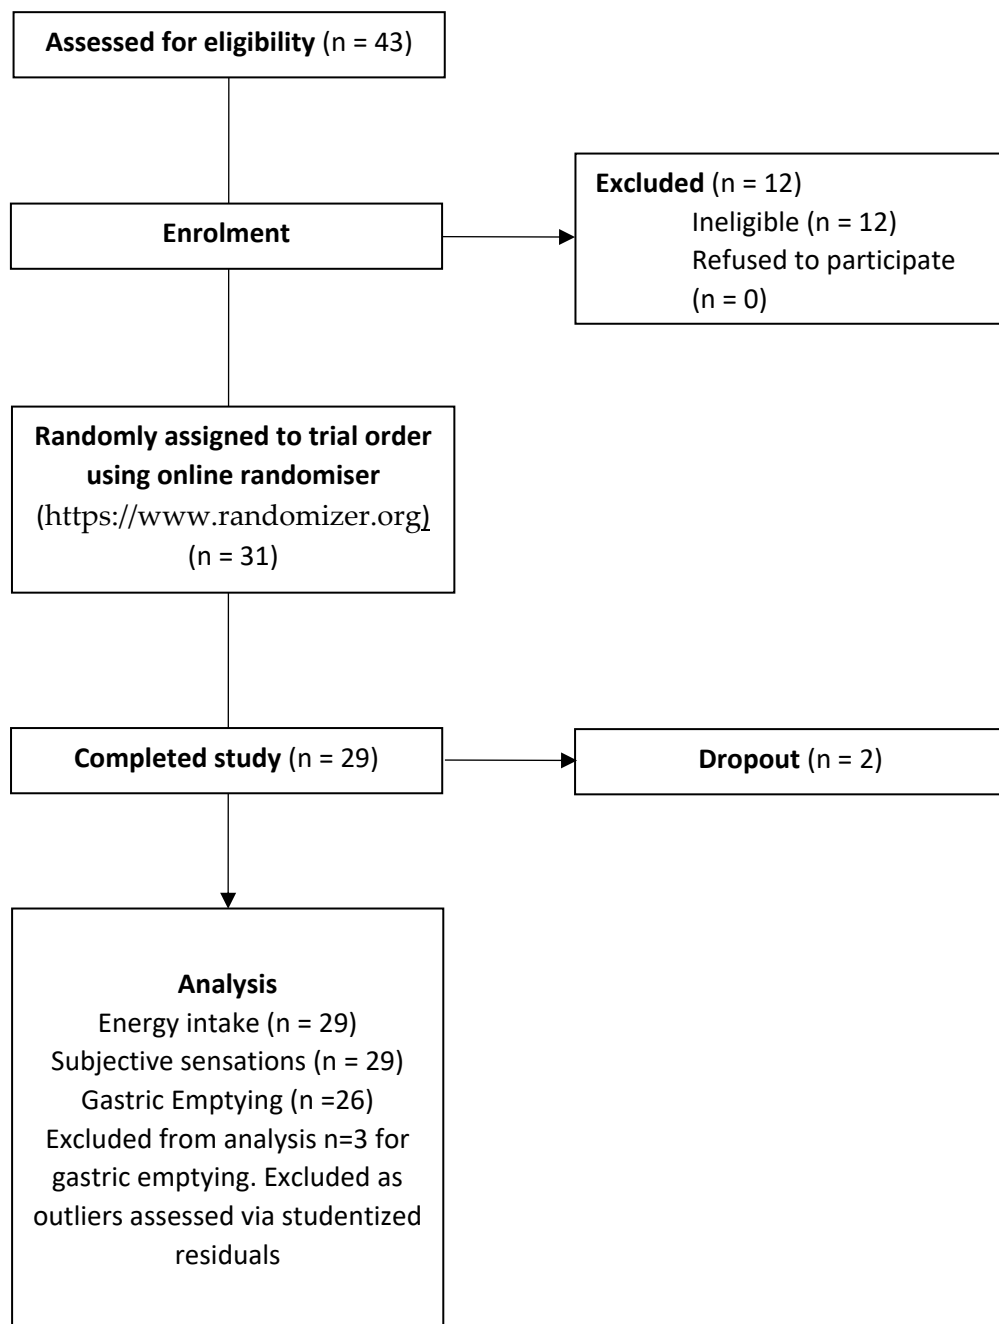

Supplement: s1 [file s1]
